# Supplementary material
Source: publisher figshare collection journal article supplement (https://tandf.figshare.com/articles/dataset/_/9872915)

## Pan-reactive transcripts

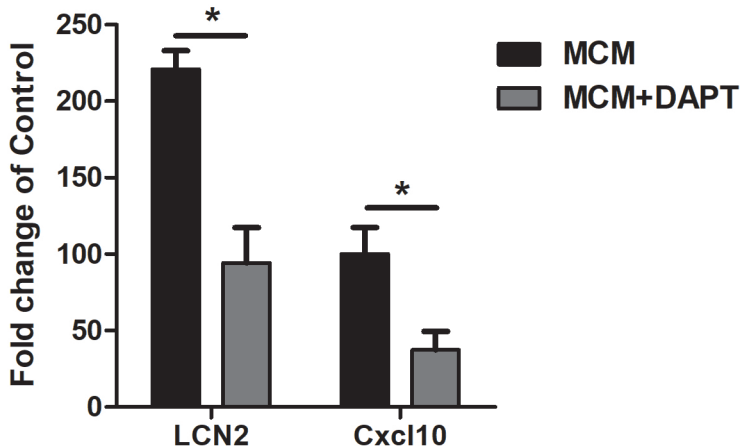

Supplement: Supplementary file 1 [file 1]

A

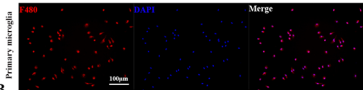

B

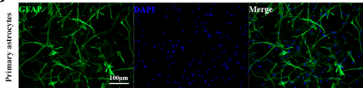

C

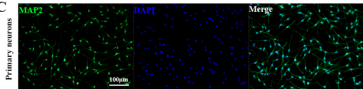

Supplement: Supplementary file 2 [file 1]

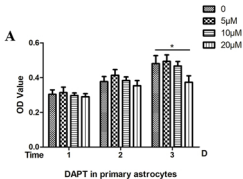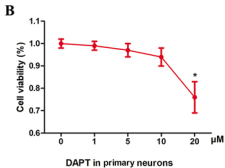

Supplement: Supplementary file 3 [file 1]

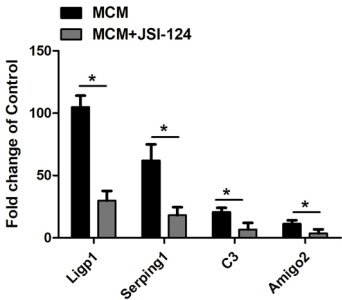

Supplement: Supplementary file 4 [file 1]

**A**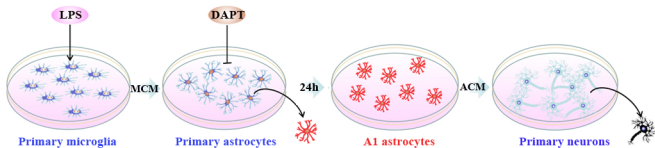**B**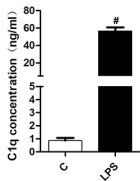**C**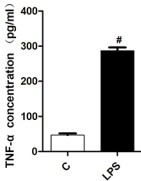**D**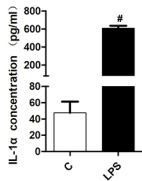**E**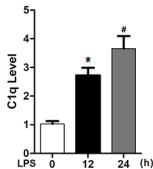**F**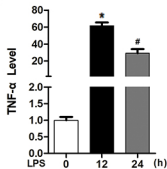**G**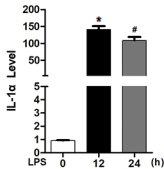**H**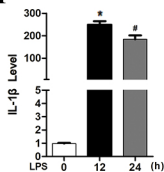**I**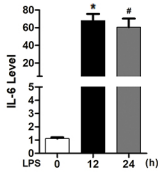

Supplement: Supplementary file 5 [file 1]
